# Supplementary material
Source: PubMed Central journal article supplement (PMC7476864)
Supplement: mmc1.pdf [file mmc1.pdf]

## Appendix

Table I. Primers and probes sequences used for respiratory viral targets.

| Target Primers and Probe set | Sequence                                            | Sequence Reference and supplier                                         |
|------------------------------|-----------------------------------------------------|-------------------------------------------------------------------------|
| <b><u>FLU A</u></b>          |                                                     | World Health Organisation, 2007. SA                                     |
| 11A forward                  | 5'-AAGACCAATCCTGTACCTCTGA-3'                        |                                                                         |
| 11B reverse                  | 5'-CAAAGCGTCTACGCTGCAGTCC-3'                        |                                                                         |
| 11P probe                    | 5'-FAM-TTTGTGTTCCACGCTCACCGTGCC-BHQ-3'              |                                                                         |
| <b><u>FLU A H1</u></b>       |                                                     | Personal communication. Anon. HPA, Colindale. SOP V-5413. LT            |
| 16A forward                  | 5'-GGAATAGCCCCCTACAATTG-3'                          |                                                                         |
| 16B reverse                  | 5'-AATTTCGCATTCTGGGTTTCCTA-3'                       |                                                                         |
| 16P probe                    | 5'-FAM-CGTTGCCGGATGGA-MGBNFQ-3'                     |                                                                         |
| <b><u>FLU A H3</u></b>       |                                                     | Personal communication. Anon. HPA, Colindale. SOP V-5413. LT            |
| 17A forward                  | 5'-CCTTTTTGTTGAACGCAGCAA-3'                         |                                                                         |
| 17B reverse                  | 5'-CGGATGAGGCAACTAGTGACCTA-3'                       |                                                                         |
| 17P probe                    | 5'-FAM-CCTACAGCAACTGTTACC-MGBNFQ-3                  |                                                                         |
| <b><u>FLU A H5</u></b>       |                                                     | Health Protection Agency (2009). LT                                     |
| 9A forward                   | 5'-GGATGGCAGGGAATGGTAGA-3'                          |                                                                         |
| 9B reverse                   | 5'-TCTATTGCCTTTTGAGTGGATTCT T-3'                    |                                                                         |
| 9P probe                     | 5'-FAM-TGGGTACCACCATAGCAAYGAGCAGG-MGBNFQ-3'         |                                                                         |
| <b><u>FLU B</u></b>          |                                                     | Van Elden, L J R et al, 2001. SA                                        |
| 4A forward                   | 5'-AAATACGGTGGATTAATAAAAAGCAA-3'                    |                                                                         |
| 4B reverse                   | 5'-CCAGCAATAGCTCCGAAGAAA-3'                         |                                                                         |
| 4P probe                     | FAM-5'-CACCCATATTGGGCAATTTCTATGGC-3'-TAMRA          |                                                                         |
| <b><u>RSV A</u></b>          |                                                     | Gunson, R N et al, 2005. SA                                             |
| 4A forward                   | 5'-AGATCAACTTCTGTCCATCCAGCAA-3'                     |                                                                         |
| 4B reverse                   | 5'-TTCTGCACATCATAATTAGGAG TATCAAT-3'                |                                                                         |
| 4P probe                     | 5'-FAM-CACCATCCAACGGAGCACAGGAGAT-BHQ-3'             |                                                                         |
| <b><u>RSV B</u></b>          |                                                     | Personal Communication, Anon. Specialist Virology Centre, Gartnavel. SA |
| 5A forward                   | 5'-AAGATGCAAATCATAAATTCACAGGA-3'                    |                                                                         |
| 5B reverse                   | 5'-TGATATCCAGCATCTTTCAGTATCTTTATA-3'                |                                                                         |
| 5P1 probe                    | 5'-FAM-TTCCCTTCCTAACCTGGACATAGCATATAACATACCT-BHQ-3' |                                                                         |
| <b><u>MPV 1A</u></b>         |                                                     | Kuypers, J et al. 2005. LT                                              |
| 3A forward                   | 5'-GCCGTTAGCTTCAGTCAATTCAA-3'                       |                                                                         |
| 3B reverse                   | 5'-TCCAGCATTGTCTGAAAATTGC-3'                        |                                                                         |
| 3P probe                     | 5'-FAM-CAACATTTAGAAACCTTCT-MGBNFQ-3'                |                                                                         |
| <b><u>MPV 2B</u></b>         |                                                     | Kuypers, J et al. 2005. LT                                              |
| 3A forward                   | 5'-GCCGTTAGCTTCAGTCAATTCAA-3'                       |                                                                         |
| 3B reverse                   | 5'-TCCAGCATTGTCTGAAAATTGC-3'                        |                                                                         |
| 4P probe                     | 5'-FAM-CGCACAACATTTAGGAATCTTCT-MGBNFQ-3'            |                                                                         |
| <b><u>PF1</u></b>            |                                                     | Personal Communication, Anon. Specialist Virology Centre, Gartnavel. LT |
| 2A forward                   | 5'-GTGATTTAAACCCGGTAATTTCTCA-3'                     |                                                                         |
| 2B reverse                   | 5'-CCTTGTTCCCTGCAGCTATTACAAGA-3'                    |                                                                         |
| 2P probe                     | 5'-FAM-ACCTATGACATCAACGAC-MGBNFQ-3'                 |                                                                         |
| <b><u>PF2</u></b>            |                                                     | Personal Communication, Anon. Specialist Virology Centre, Gartnavel. LT |
| 2A forward                   | 5'-ATGAAAACCATTTACCTAAGTGATGGA-3'                   |                                                                         |
| 2B reverse                   | 5'-CCTCCYGGTATRGAGTGAAC-3'                          |                                                                         |
| 2P probe                     | 5'-FAM-TCAATCGCAAAGC-MGBNFQ-3'                      |                                                                         |

|                        |                                              |                                                              |
|------------------------|----------------------------------------------|--------------------------------------------------------------|
| <b><u>PF3</u></b>      |                                              | Gunson, R N et al, 2005. SA                                  |
| <b>3A forward</b>      | 5'-CCAGGGATATAYTAYAAAGGCAAAA-3'              |                                                              |
| <b>3B reverse</b>      | 5'-CCGGGRCACCCAGTTGTG-3'                     |                                                              |
| <b>3P probe</b>        | 5'-FAM-TGGRTGTTCAAGACCTCCATAYCCGAGAAA-BHQ-3' |                                                              |
| <b><u>COV 229E</u></b> |                                              | Gunson, R N et al, 2005. SA                                  |
| <b>6A forward</b>      | 5'-CAGTCAAATGGGCTGATGCA-3'                   |                                                              |
| <b>6B reverse</b>      | 5'-AAAGGGCTATAAAGAGAATAAGGTATTCT-3'          |                                                              |
| <b>6P probe</b>        | 5'-FAM-CCCTGACGACCACGTTGTGGTTCA-BHQ-3'       |                                                              |
| <b><u>COV OC43</u></b> |                                              | Gunson, R N et al, 2005. SA                                  |
| <b>7A forward</b>      | 5'-CGATGAGGCTATTCCGACTAGGT-3'                |                                                              |
| <b>7B reverse</b>      | 5'-CCTTCCTGAGCCTTCAATATAGTAACC-3'            |                                                              |
| <b>7P probe</b>        | 5'-FAM-TCCGCCTGGCACGGTACTCCCT-BHQ-3'         |                                                              |
| <b><u>COV NL63</u></b> |                                              | Gunson, R N et al, 2005. SA                                  |
| <b>8A forward</b>      | 5'-ACGTACTIONCTATTATGAAGCATGATATTA-3'        |                                                              |
| <b>8B reverse</b>      | 5'-AGCAGATCTAATGTTATACTTAAACTACG-3'          |                                                              |
| <b>8P1 probe</b>       | 5'-FAM-ATTGCCAAGGCTCCTAACGTACAGGTGTT-BHQ-3'  |                                                              |
| <b><u>COV HKU1</u></b> |                                              | Raymond, F et al, 2009. LT                                   |
| <b>9A forward</b>      | 5'-TTGAAGGCTCAGGAAGGTCTGCT-3'                |                                                              |
| <b>9B reverse</b>      | 5'-TGCTTAGTKACTTGCTGAGGTTTAG -3'             |                                                              |
| <b>9P probe</b>        | 5'-6FAM-TAAAACAAGATTAGCGATCTC-MGBNFQ-3'      |                                                              |
| <b><u>ADV</u></b>      |                                              | Heim, A et al, 2003. SA                                      |
| <b>3A forward</b>      | 5'-GCCACGGTGGGGTTTCTAAACTT-3'                |                                                              |
| <b>3B reverse</b>      | 5'-GCCCCAGTGGTCTTACATGCACATC-3'              |                                                              |
| <b>3P probe</b>        | 5'-FAM-TGCACCAGMCCSGGGCTCAGGTACTCCGA-BHQ-3'  |                                                              |
| <b><u>HRV 1</u></b>    |                                              | In-house development. Regional Virus Laboratory, Belfast. LT |
| <b>7A forward</b>      | 5'-AGCCTGCGTGGCTGCCTG-3'                     |                                                              |
| <b>7A2 forward</b>     | 5'-CCTGCGTGGCGGCCARC-3'                      |                                                              |
| <b>7B reverse</b>      | 5'-CCCAAAGTAGTYGGTCCCRCTCC-3'                |                                                              |
| <b>7P probe</b>        | 5'-FAM-TCCTCCGGCYCCTGAATG-3'-MGBNFQ          |                                                              |
| <b><u>HRV 2</u></b>    |                                              | Scheltinga, S A et al, 2005. SA                              |
| <b>8A forward</b>      | 5'-GACARGGTGTGAAGAGCC-3'                     |                                                              |
| <b>8B forward</b>      | 5'-GACATGGTGTGAAGACYC-3'                     |                                                              |
| <b>8C reverse</b>      | 5'-CAAAGTAGTYGGTCCCATCC'-3                   |                                                              |
| <b>8P probe</b>        | 5'-FAM-TCCTCCGGCCCCCTGAATGYGGCTAA-3'-BHQ1    |                                                              |
| <b><u>BOV</u></b>      |                                              | Allander, T et al, 2007. SA                                  |
| <b>2A forward</b>      | 5'-GGAAGAGACACTGGCAGACAA-3'                  |                                                              |
| <b>2B reverse</b>      | 5'-GGGTGTTCTGATGATATGAGC-3'                  |                                                              |
| <b>2P probe</b>        | 5'-FAM-CTGCGGCTCCTGCTCCTGTGAT-BHQ-3'         |                                                              |
| <b><u>RNP</u></b>      |                                              | World Health Organisation, 2009. SA                          |
| <b>1A forward</b>      | 5'-AGATTTGGACCTGCGAGCG-3'                    |                                                              |
| <b>1B reverse</b>      | 5'-GAGCGGCTGTCTCCACAAGT-3'                   |                                                              |
| <b>1P probe</b>        | 5'-6FAM-TTCTGACCTGAAGGCTCTGCGCG-BHQ-3'       |                                                              |

For each target in the test panel, the forward and reverse primers, probe sequences, reporters and quenchers are presented, along with their initial source references and supplier details.

Abbreviations: "ADV: adenovirus; BHQ: Blackhole Quencher;BOV: bocavirus; FAM: 6-carboxyfluorescein (reporter molecule); COV: coronavirus; FLU A: influenza A; FLU B: influenza B; LT: Life Technologies (Paisley, UK); MGBNFQ: minor groove binding nonfluorescent quencher; MPV: metapneumovirus; PF:

parainfluenza; RHV: rhinovirus; RNP: Ribonuclease P; RSV: Respiratory Syncytial Virus; SA: Sigma-Aldrich Company Ltd(Dorset, UK); TAMRA: Carboxytetramethylrhodamine”.

**Table 1. List of reagents used in the preparation of respiratory viral-related amplification mixes.**

Each provides instruction for the preparation of 1000 tests when reaction volume used is 8µl. All volumes shown are µl.

All RNA target TaqMan master mixes were prepared using SuperScript® III Platinum® One-Step Quantitative RT-PCR System (Life Technologies, Paisley, UK).

**Influenza A Matrix**

|                                       |             |
|---------------------------------------|-------------|
| Nuclease free water                   | <b>1580</b> |
| Reaction mix x2                       | <b>5000</b> |
| BSA @ 2µg/µl (final 0.2µg/µl)         | <b>1000</b> |
| MgSO <sub>4</sub> @ 50mM (final 4mM)  | <b>160</b>  |
| FLA 11A @ 200µM (final 0.4µM)         | <b>20</b>   |
| FLA 11B @ 200µM (final 0.4µM)         | <b>20</b>   |
| FLA 11P @ 100µM (final 0.2µM) FAM-BHQ | <b>20</b>   |
| Superscript III RT/Platinum® Taq Mix  | <b>200</b>  |

**Influenza A H1(seasonal)**

|                                         |             |
|-----------------------------------------|-------------|
| NFW                                     | <b>1580</b> |
| Reaction mix x2                         | <b>5000</b> |
| BSA @ 2µg/µl (final 0.2µg/µl)           | <b>1000</b> |
| MgSO <sub>4</sub> @ 50mM (final 4mM)    | <b>160</b>  |
| FLA 16A @ 200µM (final 0.4µM)           | <b>20</b>   |
| FLA 16B @ 200µM (final 0.4µM)           | <b>20</b>   |
| FLA 16P @ 100µM (final 0.2µM) FAM-TAMRA | <b>20</b>   |
| Superscript III RT/Platinum® Taq Mix    | <b>200</b>  |

**Influenza A H3**

|                                         |             |
|-----------------------------------------|-------------|
| NFW                                     | <b>1580</b> |
| Reaction Mix x2                         | <b>5000</b> |
| BSA @ 2µg/µl (final 0.2µg/µl)           | <b>1000</b> |
| MgSO <sub>4</sub> @ 50mM (final 4mM)    | <b>160</b>  |
| FLA 17A @ 200µM (final 0.4µM)           | <b>20</b>   |
| FLA 17B @ 200µM (final 0.4µM)           | <b>20</b>   |
| FLA 17P @ 100µM (final 0.2µM) FAM-TAMRA | <b>20</b>   |
| Superscript III RT/Platinum® Taq Mix    | <b>200</b>  |

**Influenza A H5**

|                                         |             |
|-----------------------------------------|-------------|
| NFW                                     | <b>1580</b> |
| Reaction Mix x2                         | <b>5000</b> |
| BSA @ 2µg/µl (final 0.2µg/µl)           | <b>1000</b> |
| MgSO <sub>4</sub> @ 50m (final 4mM)     | <b>160</b>  |
| FLA 9A @ 200µM (final 0.4µM)            | <b>20</b>   |
| FLA 9B @ 200µM (final 0.4µM)            | <b>20</b>   |
| FLA 9P @ 100µM (final 0.2µM) FAM-MGBNFQ | <b>20</b>   |
| Superscript III RT/Platinum® Taq Mix    | <b>200</b>  |

**TaqMan PCR: Influenza B**

|                                      |             |
|--------------------------------------|-------------|
| NFW                                  | <b>1580</b> |
| Reaction Mix x2                      | <b>5000</b> |
| BSA @ 2µg/µl (final 0.2µg/µl)        | <b>1000</b> |
| MgSO <sub>4</sub> @ 50mM (final 4mM) | <b>160</b>  |

|                                        |     |
|----------------------------------------|-----|
| FLB 4A @ 200µM (final 0.4µM)           | 20  |
| FLB 4B @ 200µM (final 0.4µM)           | 20  |
| FLB 4P @ 100µM (final 0.2µM) FAM-TAMRA | 20  |
| Superscript III RT/Platinum® Taq Mix   | 200 |

#### TaqMan PCR: RSV Types A&B

|                                       |      |
|---------------------------------------|------|
| NFW                                   | 1680 |
| Reaction Mix x2                       | 5000 |
| BSA @ 2µg/µl (final 0.2µg/µl)         | 1000 |
| RSV 4A @ 200µM (final 0.4µM)          | 20   |
| RSV 4B @ 200µM (final 0.4µM)          | 20   |
| RSV 4P @ 100µM (final 0.2µM) FAM-BHQ  | 20   |
| RSV 5A @ 200µM (final 0.4µM)          | 20   |
| RSV 5B @ 200µM (final 0.4µM)          | 20   |
| RSV 5P1 @ 100µM (final 0.2µM) FAM-BHQ | 20   |
| Superscript III RT/Platinum® Taq Mix  | 200  |

#### TaqMan PCR: Metapneumovirus

|                                         |      |
|-----------------------------------------|------|
| NFW                                     | 1520 |
| Reaction Mix x2                         | 5000 |
| BSA @ 2µg/µl (final 0.2µg/µl)           | 1000 |
| MgSO <sub>4</sub> @ 50mM (final 4mM)    | 160  |
| MPV 3A @ 200µM (final 0.4µM)            | 20   |
| MPV 3B @ 200µM (final 0.4µM)            | 20   |
| MPV 3P @ 100µM (final 0.2µM) FAM-MGB    | 20   |
| MPV 3A @ 200µM (final 0.4µM)            | 20   |
| MPV 4B @ 200µM (final 0.4µM)            | 20   |
| MPV 4P @ 100µM (final 0.2µM) FAM-MGBNFQ | 20   |
| Superscript III RT/Platinum® Taq Mix    | 200  |

#### TaqMan PCR: Rhinovirus1

|                                      |      |
|--------------------------------------|------|
| NFW                                  | 1560 |
| Reaction mix x2                      | 5000 |
| BSA @ 2µg/µl (final 0.2µg/µl)        | 1000 |
| MgSO <sub>4</sub> @ 50mM (final 4mM) | 160  |
| HRV 7A @ 200µM (final 0.4µM)         | 20   |
| HRV 7A2 @ 200µM (final 0.4µM)        | 20   |
| HRV 7B @ 200µM (final 0.4µM)         | 20   |
| HRV 7P @ 100µM (final 0.2µM) FAM-MGB | 20   |
| Superscript III RT/Platinum® Taq Mix | 200  |

#### TaqMan PCR: Rhinovirus2

|                                        |      |
|----------------------------------------|------|
| NFW                                    | 1660 |
| Reaction mix x2                        | 5000 |
| BSA @ 2µg/µl (final 0.2µg/µl)          | 1000 |
| MgSO <sub>4</sub> @ 50mM (final 3.5mM) | 80   |
| HRV 8A @ 200µM (final 0.2µM)           | 10   |
| HRV 8B @ 200µM (final 0.2µM)           | 10   |
| HRV 8C @ 200µM (final 0.4µM)           | 20   |
| HRV 8P @ 100µM (final 0.2µM) FAM-BHQ   | 20   |

|                                      |            |
|--------------------------------------|------------|
| Superscript III RT/Platinum® Taq Mix | <b>200</b> |
|--------------------------------------|------------|

#### RNP

|                                      |             |
|--------------------------------------|-------------|
| NFW                                  | <b>1700</b> |
| Reaction mix x2                      | <b>5000</b> |
| BSA @ 2µg/µl (final 0.2µg/µl)        | <b>1000</b> |
| RNP 1A @ 200µM (final 0.8µM)         | <b>40</b>   |
| RNP 1B @ 200µM (final 0.8µM)         | <b>40</b>   |
| RNP 1P @ 100µM (0.2µM) FAM-BHQ       | <b>20</b>   |
| Superscript III RT/Platinum® Taq Mix | <b>200</b>  |

#### TaqMan PCR: Single Mix: Parainfluenza 1

|                                         |             |
|-----------------------------------------|-------------|
| NFW                                     | <b>1580</b> |
| Reaction mix x2                         | <b>5000</b> |
| BSA @ 2µg/µl (final 0.2µg/µl)           | <b>1000</b> |
| MgSO <sub>4</sub> @ 50mM (final 4mM)    | <b>160</b>  |
| PF1 2A @ 200µM (final 0.4µM)            | <b>20</b>   |
| PF1 2B @ 200µM (final 0.4µM)            | <b>20</b>   |
| PF1 2P @ 100µM (final 0.2µM) FAM-MGBNFQ | <b>20</b>   |
| Superscript III RT/Platinum® Taq Mix    | <b>200</b>  |

#### TaqMan PCR: Single Mix: Parainfluenza 2

|                                         |             |
|-----------------------------------------|-------------|
| NFW                                     | <b>1580</b> |
| Reaction mix x2                         | <b>5000</b> |
| BSA @ 2µg/µl (final 0.2µg/µl)           | <b>1000</b> |
| MgSO <sub>4</sub> @ 50mM (final 4mM)    | <b>160</b>  |
| PF2 2A @ 200µM (final 0.4µM)            | <b>20</b>   |
| PF2 2B @ 200µM (final 0.4µM)            | <b>20</b>   |
| PF2 2P @ 100µM (final 0.2µM) FAM-MGBNFQ | <b>20</b>   |
| Superscript III RT/Platinum® Taq Mix    | <b>200</b>  |

#### TaqMan PCR: Single Mix: Parainfluenza 3

|                                      |             |
|--------------------------------------|-------------|
| NFW                                  | <b>1580</b> |
| Reaction Mix x2                      | <b>5000</b> |
| BSA @ 2µg/µl (final 0.2µg/µl)        | <b>1000</b> |
| MgSO <sub>4</sub> @ 50mM (final 4mM) | <b>160</b>  |
| PF3 3A @ 200µM (final 0.4µM)         | <b>20</b>   |
| PF3 3B @ 200µM (final 0.4µM)         | <b>20</b>   |
| PF3 3P @ 100µM (final 0.2µM) FAM-BHQ | <b>20</b>   |
| Superscript III RT/Platinum® Taq Mix | <b>200</b>  |

#### TaqMan PCR: Parainfluenza MULTIPLX

|                                         |             |
|-----------------------------------------|-------------|
| NFW                                     | <b>1460</b> |
| Buffer @ x2                             | <b>5000</b> |
| BSA @ 2µg/µl (final 0.2µg/µl)           | <b>1000</b> |
| MgSO <sub>4</sub> @ 50m (final 4mM)     | <b>160</b>  |
| PF1 2A @ 200µM (final 0.4µM)            | <b>20</b>   |
| PF1 2B @ 200µM (final 0.4µM)            | <b>20</b>   |
| PF1 2P @ 100µM (final 0.2µM) FAM-MGBNFQ | <b>20</b>   |
| PF2 2A @ 200µM (final 0.4µM)            | <b>20</b>   |

|                                         |     |
|-----------------------------------------|-----|
| PF2 2B @ 200µM (final 0.4µM)            | 20  |
| PF2 2P @ 100µM (final 0.2µM) FAM-MGBNFQ | 20  |
| PF3 3A @ 200µM (final 0.4µM)            | 20  |
| PF3 3B @ 200µM (final 0.4µM)            | 20  |
| PF3 3P @ 100µM (final 0.2µM) FAM-BHQ    | 20  |
| Superscript III RT/Platinum® Taq Mix    | 200 |

**TaqMan PCR: Coronavirus 229E, OC43, NL63and HKU1 MULTIPLEX**

|                                         |      |
|-----------------------------------------|------|
| NFW                                     | 1400 |
| Buffer @ x2                             | 5000 |
| BSA @ 2µg/µl (final 0.2µg/µl)           | 1000 |
| MgSO <sub>4</sub> @ 50m (final 4mM)     | 160  |
| COV 6A @ 200µM (final 0.4µM)            | 20   |
| COV 6B @ 200µM (final 0.4µM)            | 20   |
| COV 6P @ 100µM (final 0.2µM) FAM-MGBNFQ | 20   |
| COV 7A @ 200µM (final 0.4µM)            | 20   |
| COV 7B @ 200µM (final 0.4µM)            | 20   |
| COV 7P @ 100µM (final 0.2µM) FAM-MGBNFQ | 20   |
| COV 8A @ 200µM (final 0.4µM)            | 20   |
| COV 8B @ 200µM (final 0.4µM)            | 20   |
| COV 8P1@ 100µM (final 0.2µM) FAM-BHQ    | 20   |
| COV 9A @ 200µM (final 0.4µM)            | 20   |
| COV 9B @ 200µM (final 0.4µM)            | 20   |
| COV 9P@ 100µM (final 0.2µM) FAM-MGB     | 20   |
| Superscript III RT/Platinum® Taq Mix    | 200  |

**TaqMan PCR: Single Mix: Coronavirus 229E**

|                                         |      |
|-----------------------------------------|------|
| NFW                                     | 1580 |
| Buffer @ x2                             | 5000 |
| BSA @ 2µg/µl (final 0.2µg/µl)           | 1000 |
| MgSO <sub>4</sub> @ 50m (final 4mM)     | 160  |
| COV 6A @ 200µM (final 0.4µM)            | 20   |
| COV 6B @ 200µM (final 0.4µM)            | 20   |
| COV 6P @ 100µM (final 0.2µM) FAM-MGBNFQ | 20   |
| Superscript III RT/Platinum® Taq Mix    | 200  |

**TaqMan PCR: Single Mix: Coronavirus OC43**

|                                         |      |
|-----------------------------------------|------|
| NFW                                     | 1580 |
| Buffer @ x2                             | 5000 |
| BSA @ 2µg/µl (final 0.2µg/µl)           | 1000 |
| MgSO <sub>4</sub> @ 50m (final 4mM)     | 160  |
| COV 7A @ 200µM (final 0.4µM)            | 20   |
| COV 7B @ 200µM (final 0.4µM)            | 20   |
| COV 7P @ 100µM (final 0.2µM) FAM-MGBNFQ | 20   |
| Superscript III RT/Platinum® Taq Mix    | 200  |

**TaqMan PCR: Single Mix: Coronavirus NL63**

|                                     |      |
|-------------------------------------|------|
| NFW                                 | 1580 |
| Buffer @ x2                         | 5000 |
| BSA @ 2µg/µl (final 0.2µg/µl)       | 1000 |
| MgSO <sub>4</sub> @ 50m (final 4mM) | 160  |
| COV 8A @ 200µM (final 0.4µM)        | 20   |
| COV 8B @ 200µM (final 0.4µM)        | 20   |

|                                        |            |
|----------------------------------------|------------|
| COV 8P1 @ 100µM (final 0.2µM) FAM-BHQ1 | <b>20</b>  |
| Superscript III RT/Platinum® Taq Mix   | <b>200</b> |

**Taqman PCR: Single Mix: Coronavirus HKU1**

|                                       |             |
|---------------------------------------|-------------|
| NFW                                   | <b>1580</b> |
| Buffer @ x2                           | <b>5000</b> |
| BSA @ 2µg/µl (final 0.2µg/µl)         | <b>1000</b> |
| MgSO <sub>4</sub> @ 50m (final 4mM)   | <b>160</b>  |
| COV 9A @ 200µM (final 0.4µM)          | <b>20</b>   |
| COV 9B @ 200µM (final 0.4µM)          | <b>20</b>   |
| COV 9P @ 100µM (final 0.2µM) FAM-BHQ1 | <b>20</b>   |
| Superscript III RT/Platinum® Taq Mix  | <b>200</b>  |

All DNA target TaqMan amplification mixes were prepared with Platinum® Quantitative PCR SuperMix-UDG (Life Technologies, Paisley, UK).

**TaqMan PCR: Bocavirus DNA**

|                                        |             |
|----------------------------------------|-------------|
| NFW                                    | <b>1740</b> |
| Platinum® qPCR Supermix-UDG            | <b>5000</b> |
| BSA @ 2µg/µl (final 0.2µg/µl)          | <b>1000</b> |
| MgCl <sub>2</sub> 50mM (final 4mM)     | <b>200</b>  |
| BOV 2A @ 200µM (final 0.4µM)           | <b>20</b>   |
| BOV 2B @ 200µM (final 0.4µM)           | <b>20</b>   |
| BOV 2P @ 100µM (final 0.2µM) FAM-TAMRA | <b>20</b>   |

**TaqMan PCR: Adenovirus DNA**

|                                      |             |
|--------------------------------------|-------------|
| NFW                                  | <b>1740</b> |
| Platinum® qPCR Supermix-UDG          | <b>5000</b> |
| BSA @ 2µg/µl (final 0.2µg/µl)        | <b>1000</b> |
| MgCl <sub>2</sub> @ 50mM (final 4mM) | <b>200</b>  |
| ADV 3A @ 200µM (final 0.4µM)         | <b>20</b>   |
| ADV 3B @ 200µM (final 0.4µM)         | <b>20</b>   |
| ADV 3P @ 100µM (final 0.2µM) FAM-BHQ | <b>20</b>   |

Abbreviations: "ADV: adenovirus; BHQ: Blackhole Quencher; BOV: bocavirus; BSA: Bovine serum albumin; COV: coronavirus; FAM: 6-carboxyfluorescein; FLU A: influenza A; FLU B: influenza B; MGBNFQ: minor groove binding nonfluorescent quencher; MgCl<sub>2</sub>: Magnesium chloride; MgSO<sub>4</sub>: Magnesium sulphate; MPV: metapneumovirus; NFW: nuclease free water; PF: parainfluenza; RHV: rhinovirus; RSV: Respiratory Syncytial Virus; TAMRA: Carboxytetramethylrhodamine.



**Table 3. Primers used in reverse-tagging step (PCR 2).**

| <b>Name</b> | <b>Sequence</b>                                                      | <b>Length</b> |
|-------------|----------------------------------------------------------------------|---------------|
| 806R_f1     | GTGAaGGAGHcAGAcGTGTGCTCCGATCTN NNNNACGGACTACHV GGG TW<br>TCTAAT      | 61            |
| 806R_f2     | GTGACTGGAGUCAGACGTGTGCTCUCCGATCTNNTNNNACGGACTACHV<br>GGGTWTCTAAT     | 62            |
| 806R_f3     | GTGAaGGAGUcAGACGTGTGAmCCGATCT NNCTNN NAC GGACTACHV<br>GCGTWTCTAAT    | 63            |
| 806R_f4     | GTGACTGGAGUCAGACGTGTGCTmCCGATCTNNACTNNNACGGACTACHV<br>GGGTWTCTAA     | 64            |
| 806R_f5     | GTGACTGGAGTrCAGACGTGTGCTCTrCCGATCTNNGAaNNNACGGAaACHW<br>GGGTWTCTAAT  | 65            |
| 806R_f6     | GTGACTGGAGTTCAGACGTGTGCTCTCCGATCTNNGACTNNNACGGACTACHV<br>GGGTWTCTAAT | 66            |

**Table 4. Primers for forward-tagging step (PCR 3).**

| <b>Name</b> | <b>Sequence</b>                                                                                                | <b>Length</b> |
|-------------|----------------------------------------------------------------------------------------------------------------|---------------|
| 515F_f1     | GCCTCCCTCGCGCCATCAGAGATGTG TATAAGAGACAG NNNN NNNNGA GTGCCA<br>GCMGCCGCGGTAA                                    | 67            |
| 515F_f2     | GCCTCCCTCGCGCCATCAGAGATGTGTATAAGAGACAG NNNNNNNN GAGTGCCA<br>GCM GCCGCGGTAA                                     | 68            |
| 515F_f3     | GCCTCCCTCGCGCCATCAGAGATGTG TATAAGAGACAG NNNN T NNNN GA<br>GTGCCAGCMGCCGCGGTAA GCCTCCCTCGCGCCATCAGAGATGTG       | 69            |
| 515F_f4     | TATAAGAGACAG NNNN CT NNNN GAGTGCCAGCMGCCGC GGTAAGCCTCCCTC<br>GCGC C ATCAGAGATGTG TATAAGAGACAG NNNN ACT NNNN GA | 70            |
| 515F_f5     | GTGCCAGCMGCCGCGGTAA GCCTCCCTCGCGCCATC AGAGATGTG TATAAGA<br>GACAG NNNN GACT NNNN GA                             | 71            |
| 515F_f6     | GTGCCAGCMGCCGCGGTAAGCCTCCCTCGCGCCATCAGAGATGTG TATAAGAG<br>ACAG NNNNTGACT NNNN GA GTGCCAGCMGCCGCGGTAA           | 72            |
